# Supplementary material
Source: publisher site journal article supplement (https://www.dovepress.com/get_supplementary_file.php?f=265779.docx)
Supplement: Supplementary file 1 [file get_supplementary_file.php]

**Supplementary information**


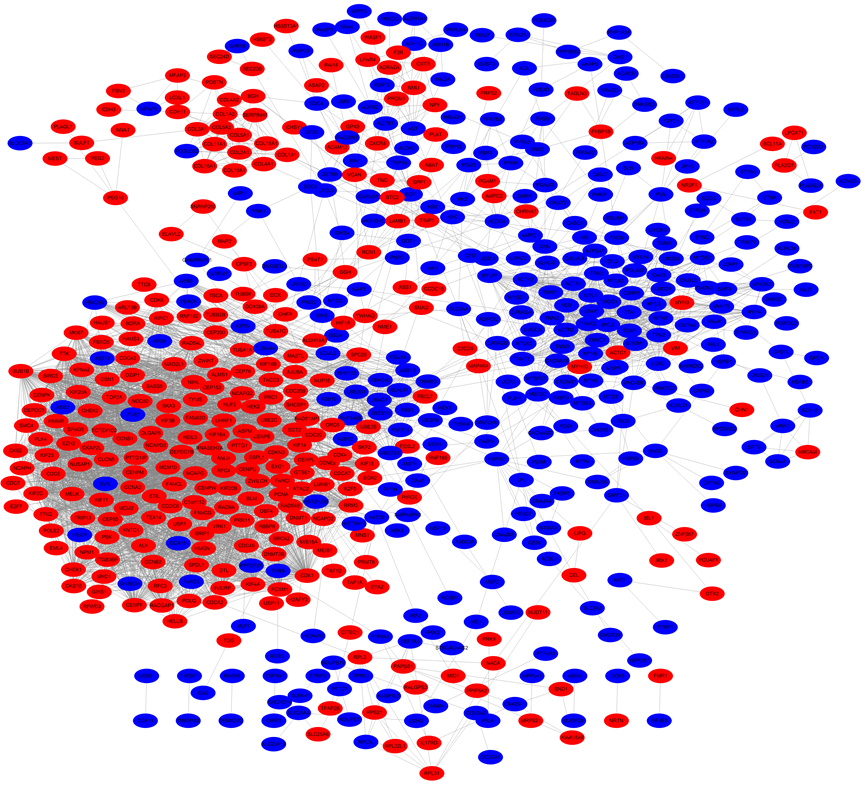


**Figure S1. DEGs PPI network complex and modular analysis.** Based on STRING and Cytoscape analysis, 498 up-regulated and 480 down-regulated DEGs were filtered into the PPI network complex. Only protein pairs with a confidence score that was >0.7 were utilized to construct the PPI network. There were 612 nodes and 5129 edges in this PPI network. Each node expresses a protein. Red nodes represent up-regulated and blue nodes indicate down-regulated DEGs. Each line represents the relationship of proteins to each other.

Abbreviations: DEGs: differentially expressed genes.


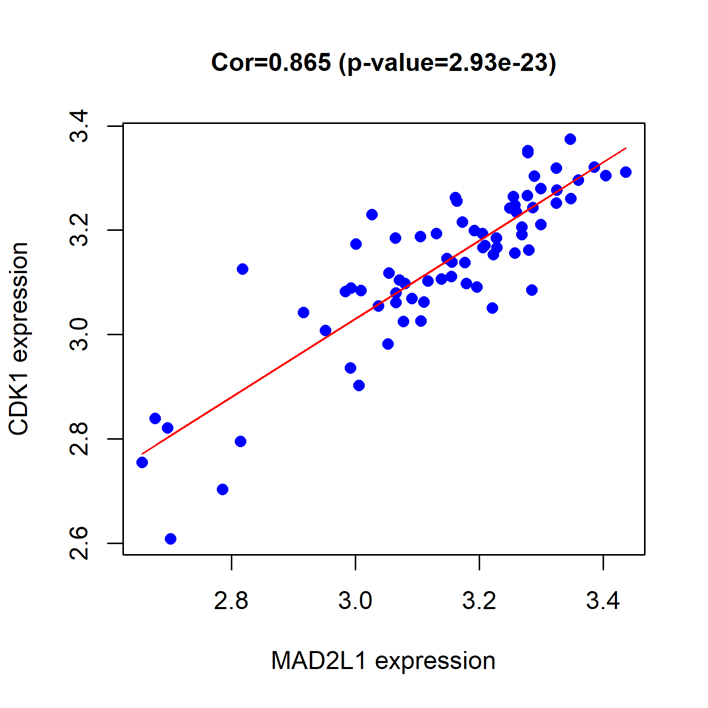


**Figure S2. CDK1 and MAD2L1 are linearly co expressed.**

**Table S1. TOP10 hub genes**

| **No.** | **Name** | **Type** | **Multiple logFC** | **entrezID** | **Gene annotation** |
| --- | --- | --- | --- | --- | --- |
| 1 | TOP2A | up-regulated gene | 5.327443665 | 7153 | DNA Topoisomerase II Alpha |
| 2 | CCNB1 | up-regulated gene | 4.736529931 | 891 | cyclin B1 |
| 3 | UBE2C | up-regulated gene | 4.553486534 | 11065 | ubiquitin-conjugating enzyme E2C |
| 4 | KIF11 | up-regulated gene | 4.231225971 | 3832 | kinesin family member 11 |
| 5 | NCAPG | up-regulated gene | 4.160005796 | 64151 | non-SMC condensin I complex, subunit G |
| 6 | CDC20 | up-regulated gene | 3.530823758 | 991 | cell division cycle 20 |
| 7 | CDK1 | up-regulated gene | 3.387191832 | 983 | cyclin-dependent kinase 1 |
| 8 | MAD2L1 | up-regulated gene | 3.132076884 | 4085 | MAD2 mitotic arrest deficient-like 1 |
| 9 | CCNA2 | up-regulated gene | 2.485590775 | 890 | cyclin A2 |
| 10 | CCNB2 | up-regulated gene | 2.383649319 | 9133 | cyclin B2 |

| **Species** | **Name of genes** | **Forward primer (5'->3')** | **Reverse primer (5'->3')** |
| --- | --- | --- | --- |
| human | TOP2A | TAATCAGGCTCGCTTTATCTT | TCCGAATCATATCCCCTCT |
| human | CCNB1 | CTTTCGCCTGAGCCTATTT | CCATCTTCTGCATCCACAT |
| human | UBE2C | TGAAGGAAAAGTGGTCTGC | GCATGTGTGTTCAAGGGA |
| human | KIF11 | CTACGATTGATGGAGAAGAGC | CCCAAAGTCAACAGGGATT |
| human | NCAPG | GATGAGGAAGAGGAAGATGGT | TGTTTATGAGCAGGCACACT |
| human | CDC20 | CCTGAGCAAGGAGAACCAG | TCCACTGAGCCGAAGGA |
| human | CDK1 | AAACTACAGGTCAAGTGGTAGCC | TCCTGCATAAGCACATCCTGA |
| human | MAD2L1 | ACGGTGACATTTCTGCCACT | TGGTCCCGACTCTTCCCATT |
| human | CCNA2 | CGGGAGCAGTGATGTTG | TCCGGGTTGATATTCTCCT |
| human | CCNB2 | CAAGCAGCAAACTCCTGAA | GGCACAATGAAGCACACA |

**Table S2. Primer sequence used for quantitative RT-PCR**

Abbreviations: TOP2A, DNA Topoisomerase II Alpha; CCNB1, cyclin B1; UBE2C, ubiquitin-conjugating enzyme E2C; KIF11, kinesin family member 11; NCAPG, non-SMC condensin I complex, subunit G; CDC20, cell division cycle 20; CDK1, Cyclin-dependent kinases 1; MAD2L1, Mitotic Arrest Deficient 2 Like 1; CCNA2, cyclin A2; CCNB2, cyclin B2.
